# Supplementary material
Source: publisher figshare collection journal article supplement (https://gsajournals.figshare.com/ndownloader/files/20105264)
Supplement: Supplementary file 1 [file 20105264]

Primer name	Sequence
YRab1Fw	ACTCTGAACAGCAGCCAGTC
YRab1Rv	CGTGTGACGACTTACTATTCCG
YRab2Fw	CTGTCGCTAGCCAGTCATCA
YRab2Rv	CCGTTTCAAAGGAAGTCGCAG
YRab3Fw	TTTCCATTCCCTCCGTGCAG
YRab3Rv	CACATCTCAACAGCAAGGCAG
YRab4Fw	GGTTTTGATCGTGTCCTGCG
YRab4Rv	AAATGTGTGCTGACAAACCGT
YRab5Fw	AGGAAGAGCGCATCCACATT
YRab5Rv	CGATACTTACCGCTCCTGGC
YRab6Fw	ACTCTGGTCACACAGCAACT
YRab6Rv	GCAGCGGATTGCCAAAATCT
YRab7Fw	GTAAGCCAACGCCACAAACTG
YRab7Rv	GGAAGTTCATAGTGCTTACCTGC
YRab8Fw	CGGGCCAGATACTGTGATCC
YRab8Rv	GCGGATGATGACACTCACCT
YRab9Fw	CTCGGGAATCGTGAGTGCAA
YRab9Rv	TGCAAAAGTTCTACGGCCTTG
YRab10Fw	ATCGAAGTTGCCACACTGGT
YRab10Rv	GTACGGTCCCGTTACTCACC
YRab11Fw	GGATTTCGTTTAGCACCCGC
YRab11Rv	CTTCCGCGATCTTCGACCAG
YRab14Fw	CAGCGACTACGGTTGGACAT
YRab14Rv	GCAGGACGGCAAGTAGAGAT
YRab18Fw	GCTGCTGTTACAGTGGTCCAT
YRab18Rv	TTCTCCACGAAGCGACGTATC
YRab19Fw	CAG CAG GCA AAA GAG ACC AG
YRab19Rv	TAT TAG TGG CGG GAT CTG GG
YRab21Fw	CAACATTTATCGCCGAGTGCC
YRab21Rv	CGGTCTTCCATGTAGCGCA
YRab23Fw	CTC CTC CAA CCG ATT TGC CT
YRab23Rv	TGA CAG AGA TTC ACG CAG CC
YRab26Fw	GAACGCCGCAATAGGAGGT
YRab26Rv	GGGGGATTGTAGGAGCCATC
YRab27Fw	GAGCCCTGTAGTCTGTGCTG
YRab27Rv	CTGCACTAGGACAAGGACGG
YRab30Fw	TCGTCTACTTTCGCAGAGCAC
YRab30Rv	CTGGCCAGGTGGAAATAGACC
YRab32Fw	GGTCGAGTTCAACAAACCGA
YRab32Rv	AGGTGGAGACAACGCTACTC
YRab35Fw	GTTCGACGCGCCTAACTG
YRab35Rv	CTGTGGGAAACGGGAATGC
YRab39Fw	TGCAAAGCCAGTAATCGTGTG
YRab39Rv	CCAAGCGTCCAAGTACAGTG
YRab40Fw	ACACGTCGTCACGTTTGTG
YRab40Rv	GCATATCCGGTGGTCGTTCA
YRabX1Fw	GAAAGCGATGCGATTGAGCC
YRabX1Rv	GAATGGAGTCCGCCGAATGG
YRabX4Fw	CCGAAAACCTCCGCAGTTGA
YRabX4Rv	CTGCACATAACAGCCGAGGTA
YRabX5Fw	AAGCCGACCAAGTTTGTGGT
YRabX5Rv	GCCATGCTCACCGATTGACG
YRabX6Fw	GCTGTTGTCGCACTGTTGTT
YRabX6Rv	CAGCCATCACGCCCTTTTAG
